# Supplementary material for: Protective Effects of Magnesium Glycyrrhizinate on Methotrexate-Induced Hepatotoxicity and Intestinal Toxicity May Be by Reducing COX-2
Source: Front Pharmacol. 2019 Mar 25;10:119. doi: 10.3389/fphar.2019.00119 (PMC6444054; doi:10.3389/fphar.2019.00119)
Supplement: DATA SHEET S1 — Original data for liver histopathological lesions. [file Data_Sheet_1.ZIP]

Archive with 11 entries (5 files):
- FIG1D/
- FIG1D/GSH/
- FIG1D/GSH/GSH1.tif
- FIG1D/MTX/
- FIG1D/MTX/MTX-1.tif
- FIG1D/MgIG(18mgkg)/
- FIG1D/MgIG(18mgkg)/MgIG18-6.tif
- FIG1D/MgIG(9mgkg)/
- FIG1D/MgIG(9mgkg)/MgIG9-1.tif
- FIG1D/control/
- FIG1D/control/Control-1.tif
